# Supplementary material
Source: PubMed Central journal article supplement (PMC5113138)
Supplement: NIHMS663252-supplement-supplement_1.pdf [file NIHMS663252-supplement-supplement_1.pdf]

## Figure Legends

**Figure 1.** Creation of the patient cohort.

**Figure 2a.** Kaplan Meier curves illustrating time to patient death, stratified by viral status.

**Figure 2b.** Kaplan Meier curves illustrating time to allograft loss, non-death censored.

**Supplemental Figure 1a.** Patient survival stratified by viral status for the “unknown” cohort, overlaid on curves from the known serostatus cohort.

**Supplemental Figure 1b.** Allograft survival stratified by viral status for the “unknown” cohort, overlaid on curves from the known serostatus cohort.

**Supplemental Table 1a.** Kaplan Meier patient survival estimates.

| <b>Time (year)</b> | <b>HIV-/HCV-</b> | <b>HCV+</b> | <b>HIV+</b> | <b>HIV+/HCV+</b> |
|--------------------|------------------|-------------|-------------|------------------|
| 1                  | 0.96             | 0.94        | 0.95        | 0.92             |
| 2                  | 0.93             | 0.90        | 0.91        | 0.85             |
| 3                  | 0.90             | 0.84        | 0.89        | 0.73             |
| 4                  | 0.87             | 0.78        | 0.85        | 0.66             |
| 5                  | 0.84             | 0.73        | 0.85        | 0.53             |
| 6                  | 0.80             | 0.66        | 0.78        | 0.31             |
| 7                  | 0.76             | 0.61        | 0.75        | 0.19             |
| 8                  | 0.72             | 0.55        | 0.66        | 0.19             |

**Supplemental Table 1b.** Kaplan Meier allograft survival estimates.

| <b>Time (year)</b> | <b>HIV-/HCV-</b> | <b>HCV+</b> | <b>HIV+</b> | <b>HIV+/HCV+</b> |
|--------------------|------------------|-------------|-------------|------------------|
| 1                  | 0.94             | 0.91        | 0.89        | 0.86             |
| 2                  | 0.90             | 0.85        | 0.85        | 0.79             |
| 3                  | 0.86             | 0.78        | 0.81        | 0.60             |
| 4                  | 0.81             | 0.71        | 0.74        | 0.55             |
| 5                  | 0.77             | 0.64        | 0.71        | 0.44             |
| 6                  | 0.72             | 0.57        | 0.66        | 0.14             |
| 7                  | 0.67             | 0.51        | 0.63        | 0.10             |
| 8                  | 0.62             | 0.44        | 0.51        | 0.10             |

**Supplemental Table 2.** Multivariable models for death and allograft loss stratified by transplant era.

| Models for Death |      |         |            | Models for Allograft loss |      |         |           |
|------------------|------|---------|------------|---------------------------|------|---------|-----------|
|                  | HR   | p value | 95% CI     |                           | HR   | p value | 95% CI    |
| <b>1996-2004</b> |      |         |            | <b>1996-2004</b>          |      |         |           |
| HIV-/HCV-        | REF  |         |            | HIV-/HCV-                 | REF  |         |           |
| HCV+             | 1.43 | <0.001  | 1.25-1.66  | HCV+                      | 1.42 | <0.001  | 1.18-1.71 |
| HIV+             | 1.02 | 0.96    | 0.38-2.72  | HIV+                      | 0.34 | 0.28    | 0.05-2.43 |
| HIV+/HCV+        | 26.1 | 0.001   | 3.65-186.9 | HIV+/HCV+                 | -    | -       | -         |
| <b>2004-2008</b> |      |         |            | <b>2004-2008</b>          |      |         |           |
| HIV-/HCV-        | REF  |         |            | HIV-/HCV-                 | REF  |         |           |
| HCV+             | 1.31 | <0.001  | 1.16-1.47  | HCV+                      | 1.36 | <0.001  | 1.20-1.53 |
| HIV+             | 1.01 | 0.96    | 0.57-1.79  | HIV+                      | 0.98 | 0.95    | 0.51-1.88 |
| HIV+/HCV+        | 3.77 | <0.001  | 1.95-7.29  | HIV+/HCV+                 | 10.6 | <0.001  | 5.01-22.4 |
| <b>2008-2013</b> |      |         |            | <b>2008-2013</b>          |      |         |           |
| HIV-/HCV-        | REF  |         |            | HIV-/HCV-                 | REF  |         |           |
| HCV+             | 1.17 | 0.04    | 1.00-1.37  | HCV+                      | 1.17 | 0.06    | 0.99-1.37 |
| HIV+             | 1.25 | 0.28    | 0.83-1.87  | HIV+                      | 0.66 | 0.11    | 0.39-1.10 |
| HIV+/HCV+        | 1.92 | 0.04    | 1.02-3.62  | HIV+/HCV+                 | 1.84 | 0.07    | 0.94-3.61 |

**Supplemental Table 3.** Clinical and demographic characteristics of the “unknown serostatus” cohort.

|                                    | HCV<br>unknown/HIV<br>unknown<br>n=89,780 | p value<br><i>compared<br/>to HIV-<br/>/HCV-</i> | HCV+/HIV<br>unknown<br>n=3680 | p value<br><i>compared<br/>to HCV+</i> | HCV<br>unknown/HIV+<br>n=23 | p value<br><i>compared<br/>to HIV+</i> |
|------------------------------------|-------------------------------------------|--------------------------------------------------|-------------------------------|----------------------------------------|-----------------------------|----------------------------------------|
| <b>Patient<br/>Characteristics</b> |                                           |                                                  |                               |                                        |                             |                                        |
| Median age (IQR)                   | 49 (38-59)                                | <0.001                                           | 49 (43-56)                    | <0.001                                 | 46 (40-52)                  | 0.94                                   |
| Male gender (%)                    | 53,409(59.5)                              | 0.001                                            | 2641 (71.7)                   | 0.12                                   | 20 (86.9)                   | 0.28                                   |
| Race (%)                           |                                           |                                                  |                               |                                        |                             |                                        |
| African American                   | 19,581 (21.8)                             |                                                  | 1819 (49.5)                   |                                        | 15 (65.2)                   |                                        |
| Caucasian                          | 51,963 (57.8)                             |                                                  | 1233 (33.6)                   |                                        | 4 (17.4)                    |                                        |
| Latino                             | 11,096 (12.4)                             | <0.001                                           | 395 (10.7)                    | 0.001                                  | 3 (13)                      | 0.51                                   |
| Asian                              | 5,136 (5.7)                               |                                                  | 156 (4.2)                     |                                        | 1 (4.4)                     |                                        |
| Other                              | 2004 (2.3)                                |                                                  | 77 (2)                        |                                        | 0 (0)                       |                                        |
| Cause of ESRD (%)                  |                                           |                                                  |                               |                                        |                             |                                        |
| Diabetes                           | 21,989 (24.5)                             |                                                  | 921 (25)                      |                                        | 3 (13.1)                    |                                        |
| Hypertension                       | 18,886 (21)                               |                                                  | 1210 (32.9)                   |                                        | 11 (47.8)                   |                                        |
| Glomerular disease                 | 20,120 (22.4)                             | <0.001                                           | 583 (15.8)                    | <0.001                                 | 2 (8.7)                     | 0.76                                   |
| Cystic disease                     | 9351 (10.5)                               |                                                  | 197 (5.4)                     |                                        | 0 (0)                       |                                        |
| Other                              | 7684 (8.6)                                |                                                  | 280 (7.6)                     |                                        | 3 (13.1)                    |                                        |
| Missing data                       | 11,750 (13)                               |                                                  | 489 (13.5)                    |                                        | 4 (17.3)                    |                                        |
| Pre-transplant dialysis<br>(%)     | 75,609 (84.3)                             | <0.001                                           | 3431 (93.2)                   | <0.001                                 | 23 (100)                    | 0.41                                   |

|                                                 |               |        |               |        |               |      |
|-------------------------------------------------|---------------|--------|---------------|--------|---------------|------|
| Median years on dialysis (IQR)                  | 2.2 (1.1-3.9) | <0.001 | 2.9 (1.5-5)   | 0.003  | 3.3 (1.5-6.2) | 0.05 |
| PRA≥30% (%)                                     | 17,056 (14.5) | <0.001 | 508 (13.8)    | 0.14   | 4 (17.3)      | 0.95 |
| Pre-transplant diabetes (%)                     | 25,495 (28.4) | <0.001 | 1129 (30.7)   | <0.001 | 5 (21.7)      | 0.20 |
| Median total days on wait list (IQR)            | 406 (160-891) | <0.001 | 436 (168-948) | 0.02   | 620 (215-808) | 0.72 |
| <b><i>Transplant Characteristics</i></b>        |               |        |               |        |               |      |
| Deceased donor (%)                              | 54,673 (60.9) | <0.001 | 2790 (75.8)   | 0.32   | 17 (73.9)     | 0.76 |
| Expanded criteria donor (%)                     | 9420 (17.3)   | <0.001 | 374 (13.5)    | 0.003  | 4 (23.5)      | 0.02 |
| Median donor age                                | 40 (27-50)    | <0.001 | 40 (29-49)    | <0.001 | 42 (27-54)    | 0.39 |
| HCV+ donor (%)                                  | 638 (0.7)     | <0.001 | 917 (24.9)    | <0.001 | 2 (8.7)       | 0.01 |
| Median cold ischemia time (hours)               | 14 (2-22)     | <0.001 | 17 (9-24)     | 0.001  | 16 (6.5-24)   | 0.61 |
| Delayed graft function (%)                      | 15,305 (17.1) | <0.001 | 945 (25.6)    | 0.01   | 6 (26.1)      | 0.60 |
| Acute rejection in the 1 <sup>st</sup> year (%) | 9606 (8.2)    | <0.001 | 547 (14.9)    | <0.001 | 2 (8.7)       | 0.55 |
| Induction Type                                  |               | <0.001 |               | <0.001 |               | 0.60 |
| Lymphodepleting                                 | 29,097 (32.4) |        | 1231 (33.5)   |        | 6 (26.1)      |      |
| Non-Lymphodepleting                             | 22,338 (24.9) |        | 926 (25.2)    |        | 4 (17.3)      |      |

**Supplemental Table 4.** Multivariable models for patient death and allograft loss, with the known and unknown serostatus patients combined.

| Variable                  | Predicting Patient Death |         |           | Predicting Allograft Loss |         |           |
|---------------------------|--------------------------|---------|-----------|---------------------------|---------|-----------|
|                           | HR                       | p value | 95% CI    | HR                        | p value | 95% CI    |
| <b>Viral Factors</b>      |                          |         |           |                           |         |           |
| HIV-/HCV-                 | REF                      |         |           | REF                       |         |           |
| HCV+                      | 1.44                     | <0.001  | 1.36-1.53 | 1.42                      | <0.001  | 1.33-1.52 |
| HIV+                      | 0.77                     | 0.11    | 0.56-1.06 | 0.55                      | 0.003   | 0.37-0.81 |
| HIV+/HCV+                 | 1.87                     | 0.005   | 1.20-2.90 | 2.22                      | 0.001   | 1.38-3.58 |
| <b>Recipient Factors</b>  |                          |         |           |                           |         |           |
| Age <40 years             | REF                      |         |           | REF                       |         |           |
| Age 40-60 years           | 1.81                     | <0.001  | 1.74-1.89 | 0.86                      | <0.001  | 0.84-0.90 |
| Age >60 years             | 3.07                     | <0.001  | 2.94-3.21 | 1.11                      | <0.001  | 1.07-1.16 |
| Male                      | 0.96                     | 0.003   | 0.93-0.98 | 0.96                      | 0.01    | 0.93-0.99 |
| African American          | 1.05                     | <0.001  | 1.02-1.08 | 1.30                      | <0.001  | 1.26-1.34 |
| Pre-transplant diabetes   | 1.77                     | <0.001  | 1.72-1.81 | 1.42                      | <0.001  | 1.38-1.46 |
| Pre-transplant dialysis   | 1.60                     | <0.001  | 1.53-1.67 | 1.56                      | <0.001  | 1.47-1.65 |
| Years on dialysis         | 1.02                     | <0.001  | 1.02-1.03 | -                         | -       | -         |
| PRA ≥30%                  | -                        | -       | -         | 1.03                      | 0.11    | 0.99-1.07 |
| <b>Transplant Factors</b> |                          |         |           |                           |         |           |
| Deceased donor            | 1.38                     | <0.001  | 1.34-1.42 | 1.67                      | <0.001  | 1.60-1.75 |
| Expanded criteria         | -                        | -       | -         | 1.39                      | <0.001  | 1.34-1.45 |

|                                             |      |        |           |      |        |           |
|---------------------------------------------|------|--------|-----------|------|--------|-----------|
| donor                                       |      |        |           |      |        |           |
| Diabetic donor                              | -    | -      | -         | 1.14 | <0.001 | 1.08-1.22 |
| HCV+ donor                                  | 1.97 | <0.001 | 1.72-2.27 | 2.01 | <0.001 | 1.68-2.39 |
| HCV donor*HCV recipient                     | 0.52 | <0.001 | 0.43-0.61 | 0.53 | <0.001 | 0.43-0.65 |
| Acute rejection in the 1 <sup>st</sup> year | -    | -      | -         | 1.73 | <0.001 | 1.67-1.79 |
| Lymphodepleting induction                   | REF  |        |           | REF  |        |           |
| Non-lymphodepleting induction               | 1.17 | <0.001 | 1.13-1.19 | 1.24 | <0.001 | 1.21-1.28 |



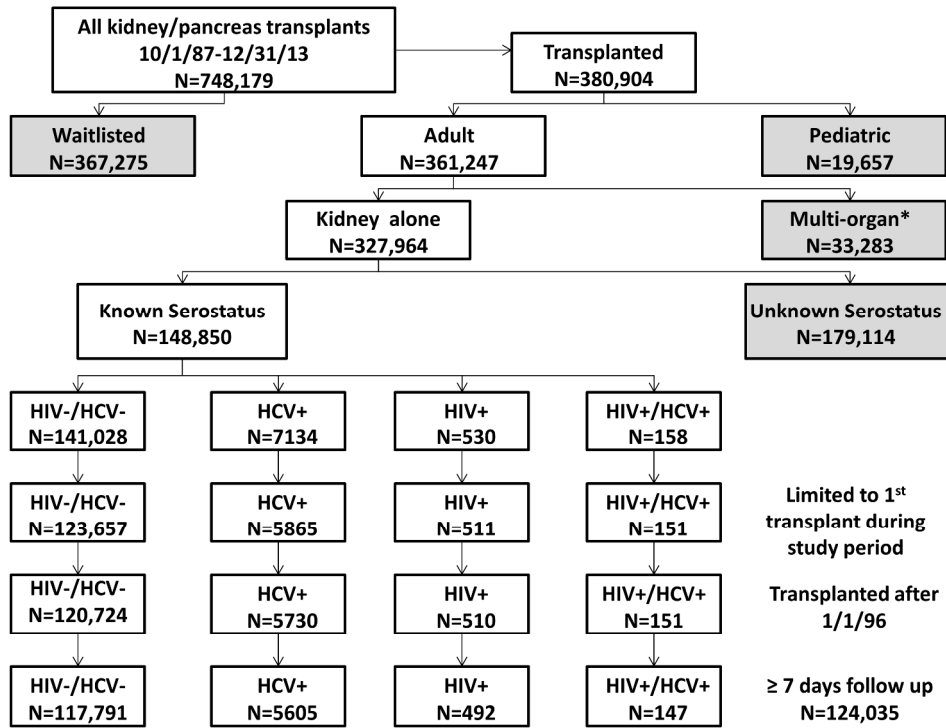

254x190mm (300 x 300 DPI)

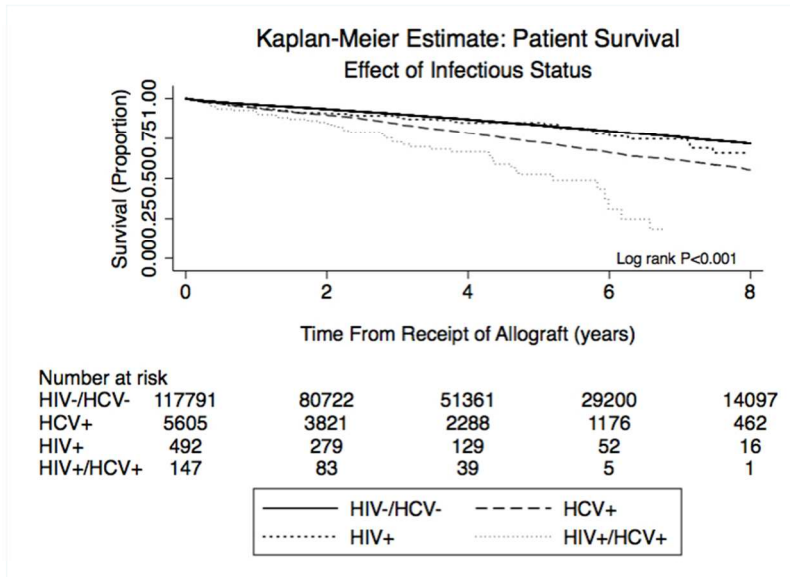

254x190mm (300 x 300 DPI)

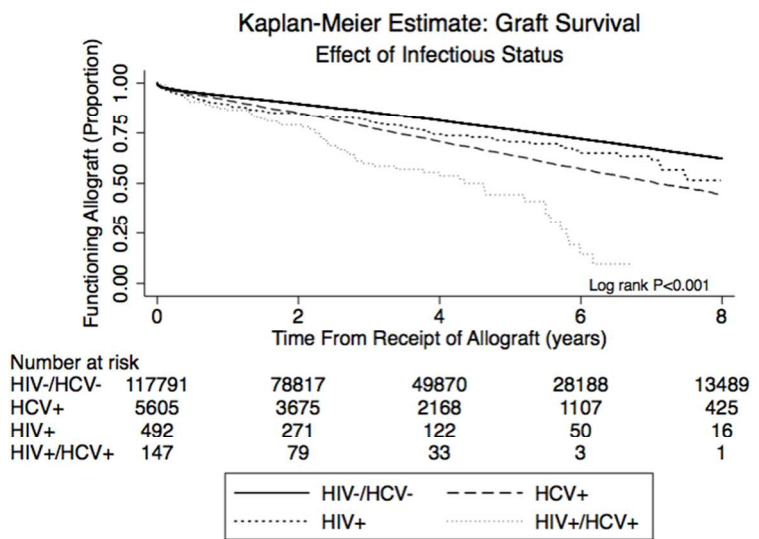

254x190mm (300 x 300 DPI)

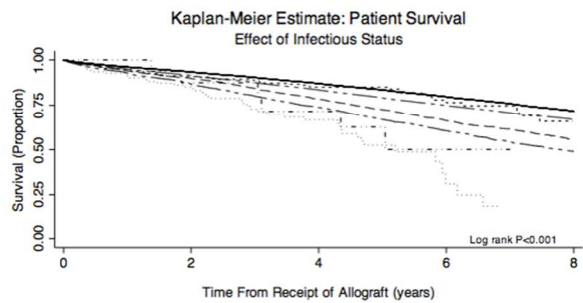

| Number at risk   | 0      | 2     | 4     | 6     | 8     |
|------------------|--------|-------|-------|-------|-------|
| HIV-/HCV-        | 117791 | 80722 | 51361 | 29200 | 14097 |
| HCV+             | 5605   | 3821  | 2288  | 1176  | 462   |
| HIV+             | 492    | 279   | 129   | 52    | 16    |
| HIV+/HCV+        | 147    | 83    | 39    | 5     | 1     |
| HIV/HCV Unknown  | 89780  | 75378 | 61577 | 47721 | 34993 |
| HCV+/HIV Unknown | 3680   | 2936  | 2221  | 1579  | 1074  |
| HIV+/HCV Unknown | 23     | 14    | 9     | 3     | 1     |

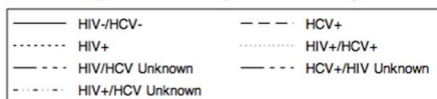

254x190mm (300 x 300 DPI)

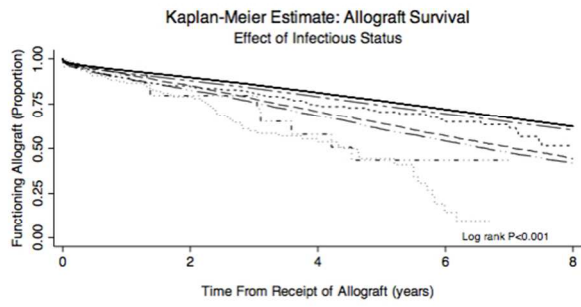

| Number at risk   | 0      | 2     | 4     | 6     | 8     |
|------------------|--------|-------|-------|-------|-------|
| HIV-/HCV-        | 117791 | 78817 | 49870 | 28188 | 13489 |
| HCV+             | 5605   | 3675  | 2168  | 1107  | 425   |
| HIV+             | 492    | 271   | 122   | 50    | 16    |
| HIV+/HCV+        | 147    | 79    | 33    | 3     | 1     |
| HIV/HCV Unknown  | 89780  | 72429 | 58483 | 45143 | 33039 |
| HCV+/HIV Unknown | 3680   | 2758  | 2019  | 1414  | 958   |
| HIV+/HCV Unknown | 23     | 14    | 8     | 3     | 1     |

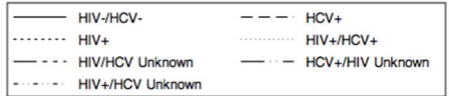

254x190mm (300 x 300 DPI)
